# Supplementary material for: Immunization of Broiler Chickens With a Killed Chitosan Nanoparticle Salmonella Vaccine Decreases Salmonella Enterica Serovar Enteritidis Load
Source: PubMed Central journal article supplement (PMC9340066; doi:10.3389/fphys.2022.920777), 2022-07-18
Supplement: Image2.pdf [file Image2.pdf]

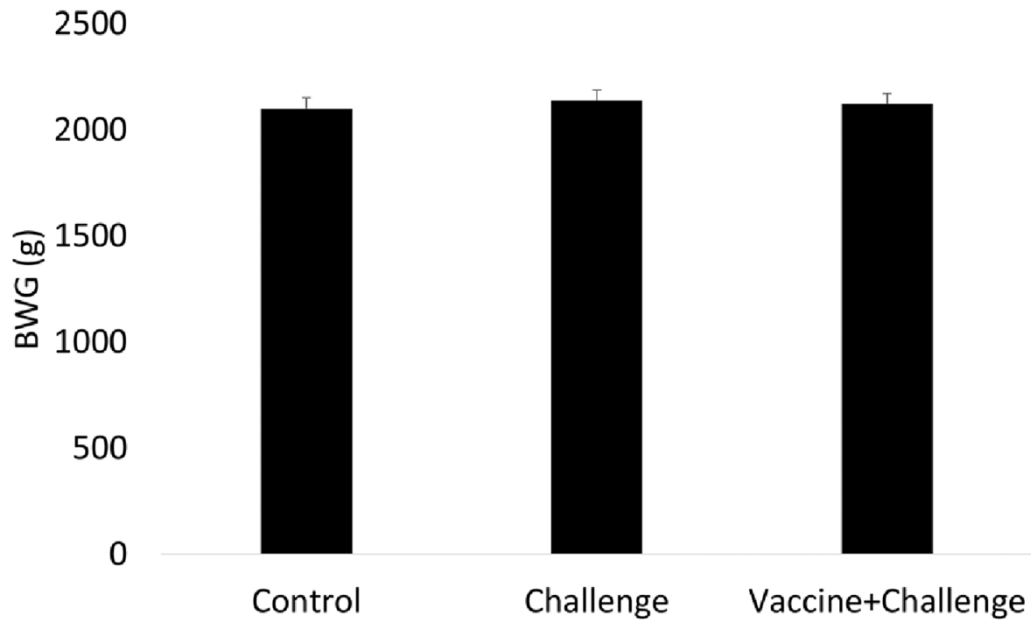

(A)

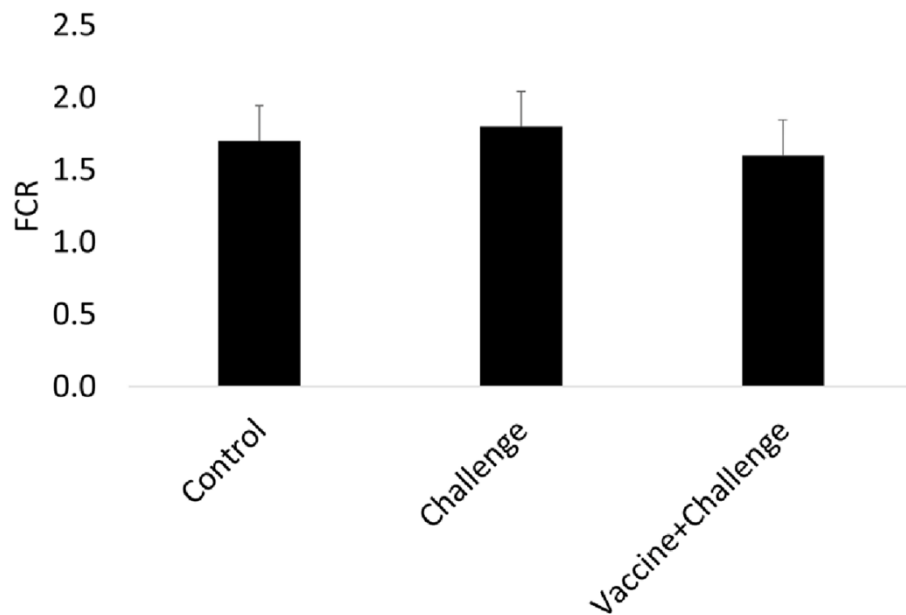

(B)

**Supplementary Figure 2. The effects of *Salmonella* CNP vaccine on production performance of vaccinated birds.** Data represents 6 pens per treatment. Results were reported as cumulative (A) BWG and (B) FCR from d0 to d35 of age. Bars (+SE) with no common superscript differ ( $P < 0.05$ ).
